# Supplementary material
Source: PubMed Central journal article supplement (PMC298752)
Supplement: pnas_0237043100_1.pdf [file pnas_0237043100_1.pdf]

## Supporting Materials and Methods

**Construction of the Core RAG2-Targeting Vector.** The core RAG2-targeting vector (pYA801) was constructed in pLNTK (1). The 3' homology arm is a 2.4-kb *KpnI*–*NotI* genomic fragment. The 5' homology arm is a 4.6-kb *XbaI* fragment consisting of the core RAG2 sequence and upstream genomic sequences. This homology arm was constructed through insertion of a 0.7-kb *KpnI*–*EcoRV* fragment of core RAG2 into a vector containing the full-length *RAG2* gene and 3' UTR (pRAG2: GFP#2) (2) to create, in effect, a gene encoding core RAG2. The 0.7-kb *KpnI*–*EcoRV* core RAG2 fragment was isolated from an intermediate plasmid (pHH11) created through ligation of an adaptor composed of annealed synthetic oligonucleotides HSH48 and 49, 5'-GAAGACTCAGAGATCGAATTCCTAAGTAGCTGAGCGGCCGCATAAT-3' and 5'-ATTAATGCGGCCGCTCAGCTACTTAGGAATTCGATCTCTGAGTCTTC-5' into the *BbvII* and *AseI* sites of plasmid LG.1 (3).

**Western Blotting for Detection of RAG2 Core Protein.** Whole thymus extract was prepared according to standard techniques and subjected to Western blot analysis (4) with anti-RAG2 antibody (PharMingen) and horseradish peroxidase-conjugated anti-rabbit antibody (Amersham Pharmacia) according to standard methods (4). ECL (Amersham Pharmacia) was used to visualize the reaction.

## Supporting Results

**Generation of Core RAG2 Mice.** Targeted replacement was carried out in TC1 (129SvEv) embryonic stem (ES) cells by positive and negative selection using *neo* and TK markers in the vector (Fig. 6B Left) with subsequent deletion of the pGK-*neo*<sup>r</sup> cassette by Cre-mediated recombination between the loxP sites (Fig. 6B Right). C57BL6 blastocysts were injected with +/c ES cells to generate chimeras that then were bred to 129SvEv mice, and the heterozygous (+/c) offspring bred to generate homozygous c/c mice. Chimeric mice were also bred into a RAG2-deficient (–/–) background (5) to obtain +/- and –/c mice. Furthermore, the core RAG2 mutation was bred onto a 129Sv/C57/B6 (F<sub>1</sub>) background. The genotypes of the resulting mice were confirmed by PCR analysis (Fig. 6C).

**Core RAG2 Expression Leads to Impaired T Cell Receptor (TCR) $\delta$  Rearrangement.** The effect of core RAG2 expression on TCR $\delta$  V(D)J recombination was examined by Southern blot of thymic DNA from 129Sv/C57B6 core RAG2 and WT control animals (Fig. 7). The use of 129Sv/C57B6 mice permits the analysis of allelic TCR $\delta$  gene rearrangements through restriction fragment-length polymorphisms associated with D $\delta$  and J $\delta$  gene segments (2). Almost all TCR $\delta$  alleles appear to undergo at least some type of rearrangement in core RAG2 thymocytes, because Southern analysis of *BglII*-digested DNA with a probe that hybridizes just 3' of J $\delta$ 1 revealed a complete loss of the germ-line

TCR $\delta$  band (Fig. 7B Left). However, in contrast to control thymocytes, core RAG2 thymocytes displayed a predominant 4.5-kb band that represents D $\delta$ 1(D $\delta$ 2)J $\delta$ 1 rearrangements. The many species of other sizes observable in the Southern blot represent complete V $\delta$ D(D $\delta$ )J $\delta$  joining. The extent of such species is reduced in the DNA from the core RAG2-expressing cells as compared with the WT cells, indicating that D $\delta$ 1(D $\delta$ 2)J $\delta$ 1 joins are accumulating, whereas complete V $\delta$ D1(D $\delta$ 2)J $\delta$ 1 assembly is impaired.

The TCR $\delta$  locus is distinct from the other loci that contain “D” segments (TCR $\beta$  and Ig heavy chain) in that rearrangement is not ordered; incomplete DD $\delta$ , DJ $\delta$ , and VD $\delta$  rearrangements have all been detected (6, 7). Because we have observed in our examination of the TCR $\beta$  and Ig heavy chain locus that V-to-DJ rearrangement is impaired, we asked whether V-to-D rearrangement is impaired at the TCR $\delta$  locus of core RAG2 mice by looking for V(D)D $\delta$  rearrangements. Because the *Bgl*II digest used in the analysis described above does not permit detection of V(D)D $\delta$  rearrangements, a second Southern blot of *Msp*I-digested thymic DNA was carried out (Fig. 7B Right). Consistent with the *Bgl*II Southern blot, the 3.9- and 4.1-kb *Msp*I bands represent D $\delta$ 1(D $\delta$ 2)J $\delta$ 1 rearrangements of the 129Sv and B6 alleles, respectively. Because the *Bgl*II Southern blots demonstrated that all D $\delta$ 2 genes have rearranged, the 2.3- and 2.6-kb bands represent alleles with V $\delta$ (D $\delta$ 1)D $\delta$ 2 rearrangements, respectively, not germ-line alleles. Therefore, core RAG2 mice can perform an appreciable level of either D $\delta$ 1(D $\delta$ 2)J $\delta$ 1 or V $\delta$ (D $\delta$ 1)D $\delta$ 2 rearrangement but a reduced level of complete TCR $\delta$  gene assembly. In accord with the reduced levels of  $\gamma\delta$  T thymocytes in core RAG2 mice (see Fig. 4C), we also observed that the total amount of hybridization to the J $\delta$ 1 probe is lower in core RAG2 mice compared with WT animals, reflecting the lower total level of germ-line or rearranged TCR $\delta$  DNA in the core RAG2 thymus. This observation is consistent with a greater proportion of the thymocytes being  $\alpha\beta$  cells that have deleted the TCR $\delta$  locus (Fig. 7B).

1. Gorman, J. R., van der Stoep, N., Monroe, R., Cogne, M., Davidson, L. & Alt, F. W. (1996) *Immunity* **5**, 241–252.
2. Monroe, R. J., Sleckman, B. P., Monroe, B. C., Khor, B., Claypool, S., Ferrini, R., Davidson, L. & Alt, F. W. (1999) *Immunity* **10**, 503–513.
3. Cuomo, C. A. & Oettinger, M. A. (1994) *Nucleic Acids Res.* **22**, 1810–1814.
4. Ausubel, F. M., Brent, R., Kingston, R. E., Moore, D. D., Seidman, J. G., Smith, J. A. & Struhl, K. (1989) *Current Protocols in Molecular Biology* (Greene & Wiley Interscience, New York).
5. Shinkai, Y., Rathbun, G., Lam, K.-P., Oltz, E. M., Stewart, V., Mendelsohn, M., Charron, J., Datta, M., Young, F., Stall, A. M. & Alt, F. W. (1992) *Cell* **68**, 855–867.
6. Chien, Y., Iwashima, M., Kaplan, K. B., Elliot, J. F. & Davis, M. M. (1987) *Nature* **327**, 677–682.

7. Migone, N., Padovan, S., Zappador, C., Giachino, C., Bottaro, M., Matullo, G., Carbonara, C., Libero, G. D. & Casorati, G. (1995) *Immunogenetics* **42**, 323–332.
